# Supplementary material for: 622Mbit/s×128bit同時動作によるユニット内超高速信号伝送
Source: Springer Nature journal article supplement (doi:10.1186/2049-3002-2-23), 1997-08-13
Supplement: 40170_2014_140_MOESM1_ESM.pdf [file 40170_2014_140_MOESM1_ESM.pdf]

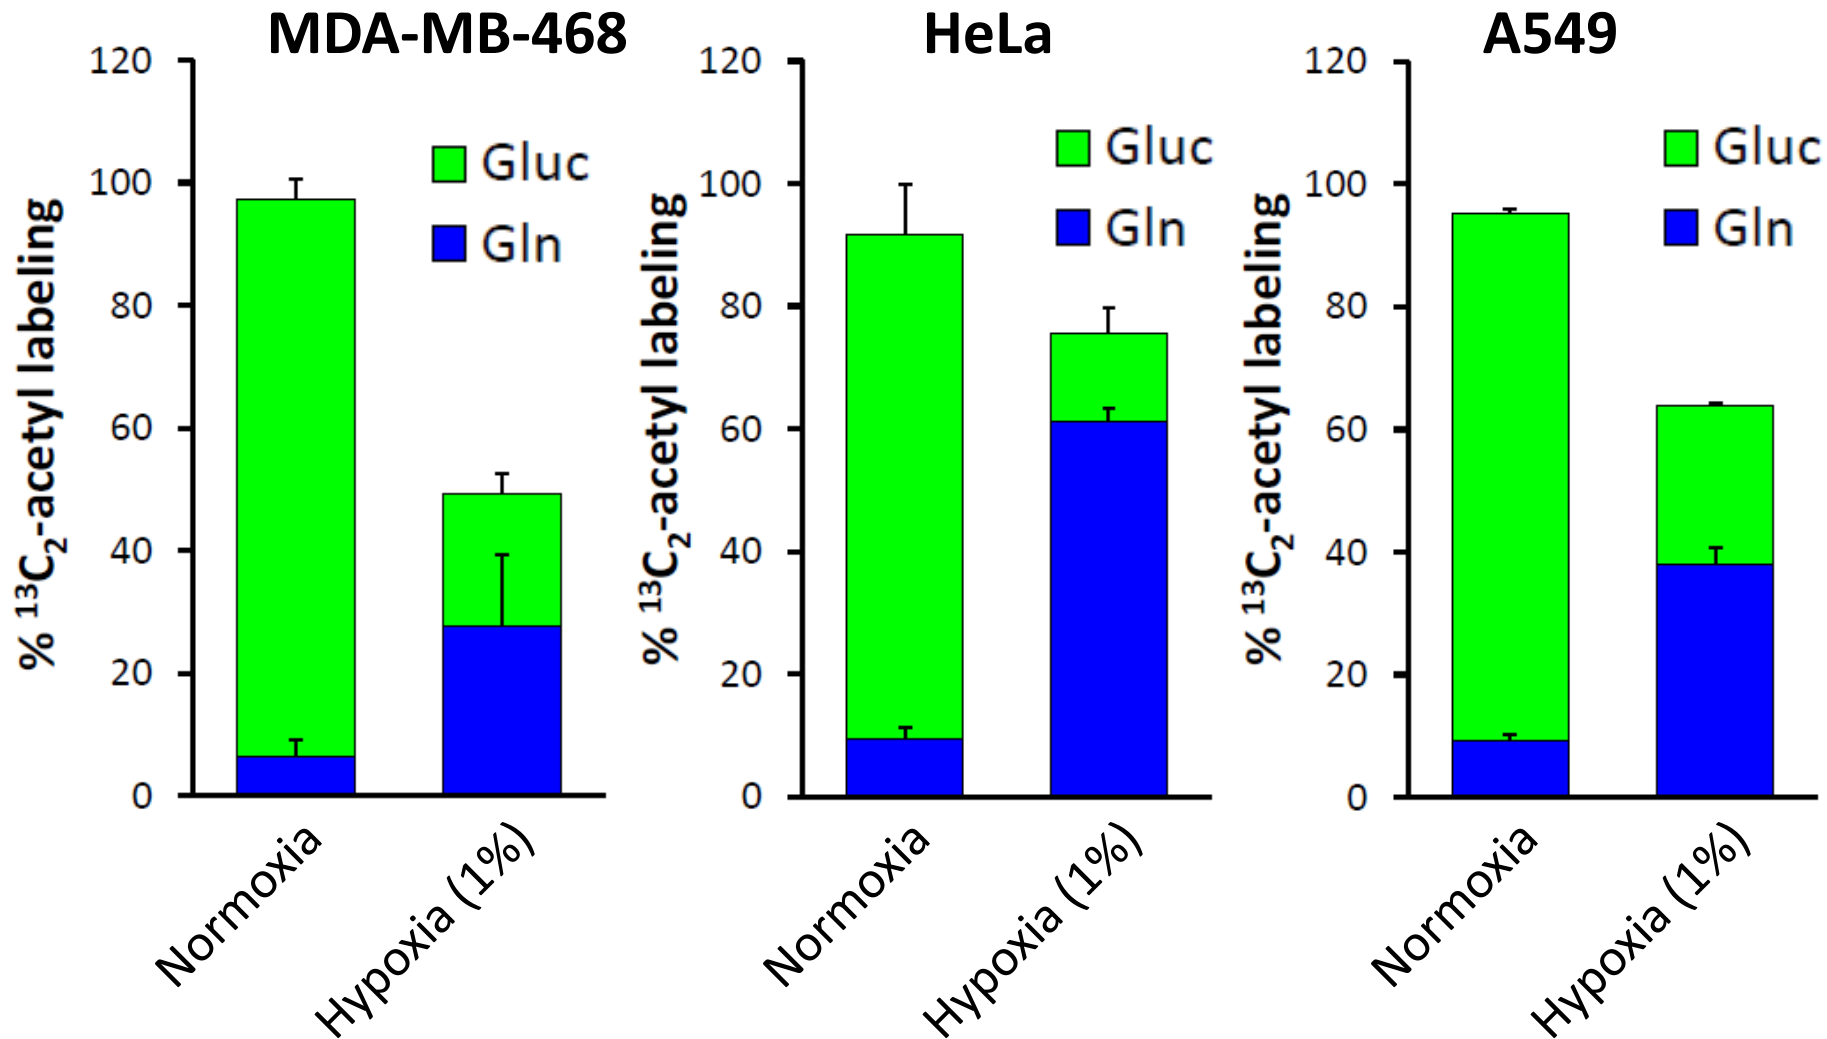

**Figure S1.** Percent labeling of acetyl groups from U- $^{13}\text{C}$ -glucose (Gluc) and U- $^{13}\text{C}$ -glutamine (Gln) in normoxia and hypoxia (1%  $\text{O}_2$ ). Acetyl labeling from N-acetyl-glutamate and glutamate at steady-state; analysis of fatty acid labeling gives equivalent results. All data are mean  $\pm$  SD of  $N=3$ .

If palmitate pool is 20% labeled, and contributes X % to 'unknown' part of AcCoA pool.

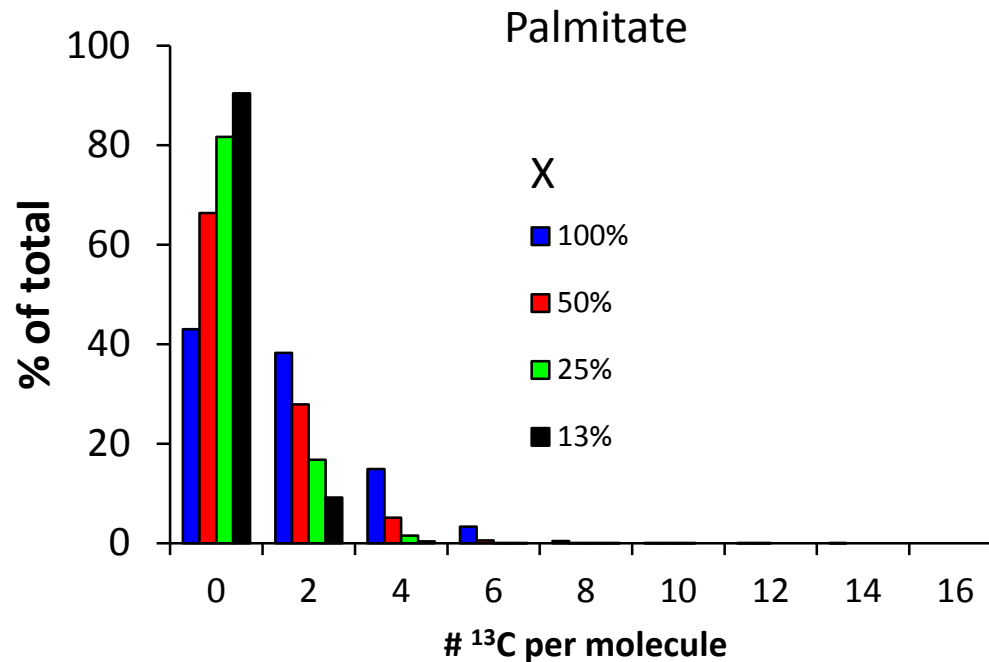

**Figure S2.** Calculation of expected palmitate labeling, based on the observation that 20% of palmitate pool is U<sup>13</sup>C-labeled, for palmitate oxidation contributing 'X' percent to the fraction of AcCoA not derived from glucose or glutamine. Even if X is 13%, significant M<sup>+2</sup> labeling would be expected, which was not observed experimentally (see Figure 3).
