# Supplementary material for: 622Mbit/s×128bit同時動作によるユニット内超高速信号伝送
Source: Springer Nature journal article supplement (doi:10.1186/2049-3002-2-23), 1997-08-13

A

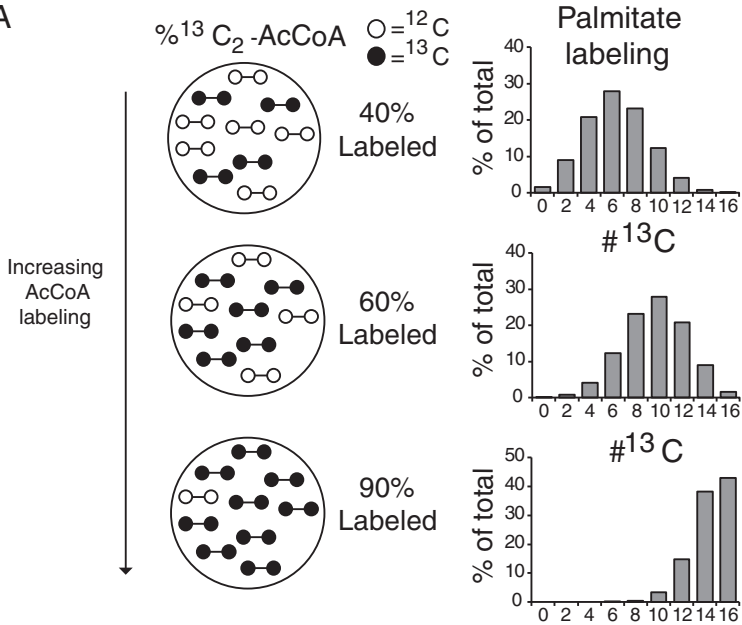

B

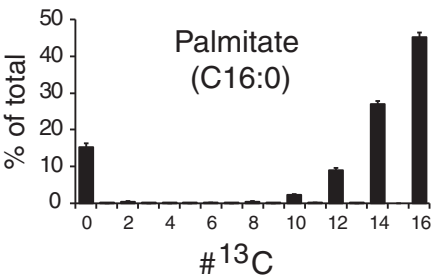

C

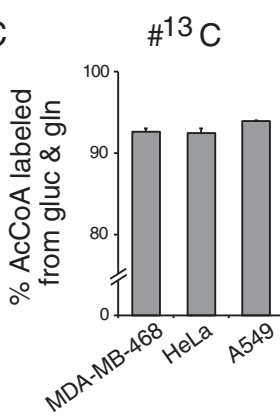

Supplement: 40170_2014_140_MOESM2_ESM.pdf [file 40170_2014_140_MOESM2_ESM.pdf]
